# Supplementary material for: WGCNA-Based Identification of Hub Genes and Key Pathways Involved in Nonalcoholic Fatty Liver Disease
Source: Biomed Res Int. 2021 Dec 13;2021:5633211. doi: 10.1155/2021/5633211 (PMC8687832; doi:10.1155/2021/5633211)
Supplement: Supplementary Materials — Table S1: 176 genes in steelblue module. Table S2: 44 hub genes in WGCNA of steelblue module. Table S3: 30 hub genes in PPI network of steelblue module ranked by degree method. [file 5633211.f1.zip]

Archive with 3 entries (3 files):
- Table S1 176hub genes.docx
- Table S2  44 hub genes in WGCNA of steelblue module.docx
- Table S3 30 hub genes in PPI network.docx
